# Supplementary material for: Multipronged activity of combinatorial miR-143 and miR-506 inhibits Lung Cancer cell cycle progression and angiogenesis in vitro
Source: PubMed Central journal article supplement (PMC6043488; doi:10.1038/s41598-018-28872-2), 2018-07-12

**Multipronged activity of combinatorial miR-143 and miR-506 inhibits Lung Cancer cell cycle progression and angiogenesis *in vitro***

A K M Nawshad Hossian<sup>1</sup>, Md. Sanaullah Sajib<sup>2</sup>, Paul E. Tullar<sup>3</sup>, Constantinos M. Mikelis<sup>2</sup>, George Mattheolabakis<sup>1\*</sup>

<sup>1</sup>Department of Basic Pharmaceutical Sciences, School of Pharmacy, University of Louisiana at Monroe

<sup>2</sup>Department of Biomedical Sciences, School of Pharmacy, Texas Tech Health Sciences Center

<sup>3</sup>Department of Obstetrics and Gynecology, School of Medicine, Texas Tech University Health Sciences

Supplementary Table 1: Cell cycle distribution for cells treated with miR-143 and/or -506 at the 24 and 48 h time points post transfection

|                    | <b>G0/G1</b> | <b>S</b> | <b>G2/M</b> |
|--------------------|--------------|----------|-------------|
| <b>24h</b>         |              |          |             |
| <b>Untreated</b>   | 47           | 41       | 11          |
| <b>miR-143</b>     | 63           | 22       | 14          |
| <b>miR-506</b>     | 63           | 23       | 14          |
| <b>miR-143+506</b> | 71           | 17       | 13          |
| <b>48h</b>         |              |          |             |
| <b>miR-143</b>     | 66           | 21       | 13          |
| <b>miR-506</b>     | 76           | 13       | 11          |
| <b>miR-143+506</b> | 75           | 12       | 13          |

Supplementary Table 2: Primer sequences for identifying different gene expressions by qRT-PCR

| <b>Target Gene</b> | <b>Primer direction</b> | <b>Primer sequence</b>   |
|--------------------|-------------------------|--------------------------|
| CDK1               | Forward                 | TTTTCAGAGCTTTGGGCACT     |
| CDK1               | Reverse                 | CCATTTTGCCAGAAATTCGT     |
| CDK4               | Forward                 | TATGAACCCGTGGCTGAAAT     |
| CDK4               | Reverse                 | CATCAGCCGTACAACATTGG     |
| CDK6               | Forward                 | CGTGGTCAGGTTGTTTGATGTG   |
| CDK6               | Reverse                 | ACTCGGTGTGAATGAAGAAAGTCC |
| GAPDH              | Forward                 | TGCACCACCAACTGCTTAGC     |
| GAPDH              | Reverse                 | GGCATGGACTGTGGTCATGAG    |
| BCL2               | Forward                 | CCTTGTGGATGACTGAGTACC    |
| BCL2               | Reverse                 | AGCCAGGAGAAATCAAACAGAG   |

Supplementary Figure 1: Cell cycle distribution for cells treated with scramble siRNA+lipofectamine compared to control

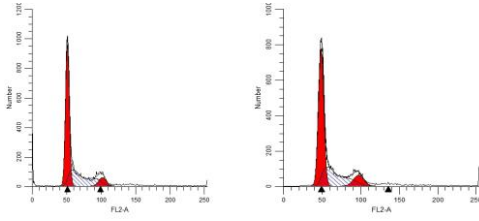

**Control 24h**

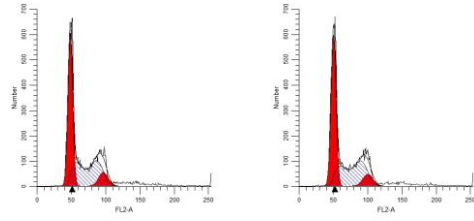

**Control 48h**

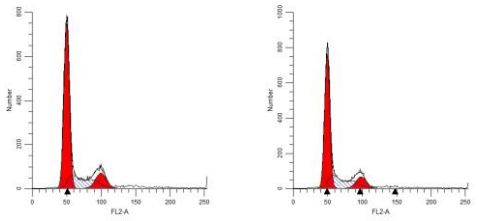

**Scramble 24h**

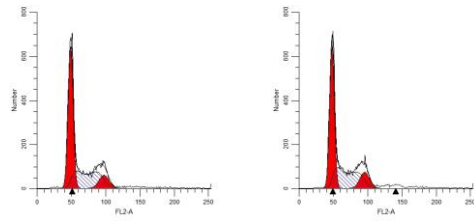

**Scramble 48h**

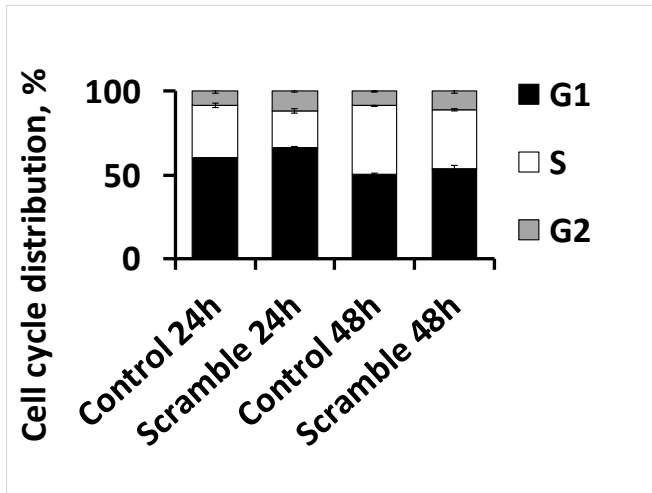

| Sample       | G0/G1 | S     | G2/M  |
|--------------|-------|-------|-------|
| Control 24h  | 60.27 | 32.54 | 7.19  |
| Control 24h  | 60.48 | 30.01 | 9.51  |
| Scramble 24h | 67.12 | 20.7  | 12.17 |
| Scramble 24h | 65.38 | 23.66 | 10.96 |
| Control 48h  | 49.81 | 41.33 | 8.86  |
| Control 48h  | 51.3  | 40.62 | 8.08  |
| Scramble 48h | 55.65 | 34.2  | 10.16 |
| Scramble 48h | 52.24 | 35.95 | 11.81 |

Supplemental Figure 2: Annexin V/PI apoptosis assay for cells treated with scramble siRNA+lipofectamine and lipofectamine alone compared to control

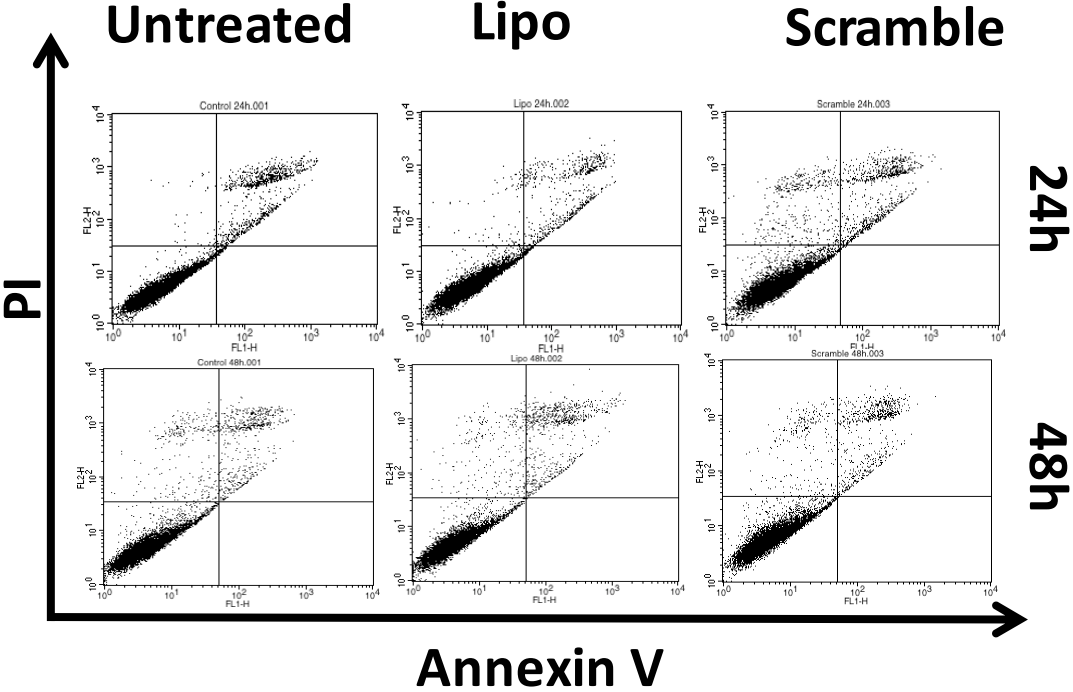

Supplementary Figure 3: RNA quality assessment prior RNA sequence (first duplicate for untreated and miR treated samples)

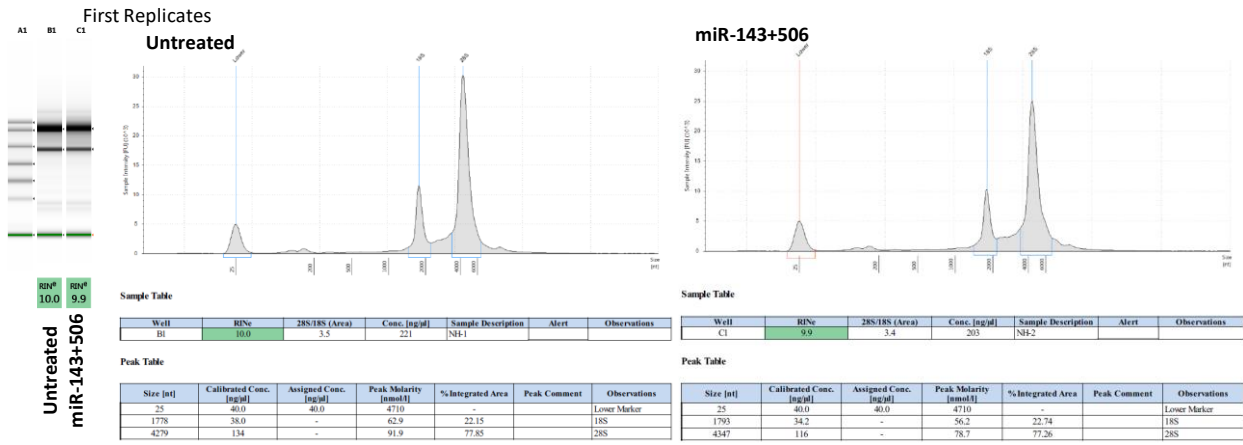

Supplemental Figure 4: RNA quality assessment prior RNA sequence (second duplicate for untreated and miR treated samples)

Second Replicates

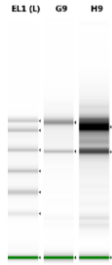

RIN<sup>®</sup> 9.9  
 RIN<sup>®</sup> 9.6  
 Untreated  
 miR-143+506

Untreated

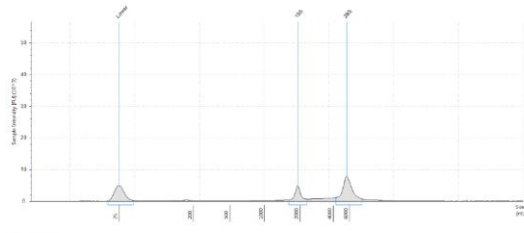

| Well | RIN <sup>®</sup> | 28S:18S (Area) | Conc. [ng/μl] | Sample Description | Alert | Observations |
|------|------------------|----------------|---------------|--------------------|-------|--------------|
| G9   | 9.9              | 2.6            | 64.6          | NH-1_2.1.10        |       |              |

| Size [nt] | Calibrated Conc. [ng/μl] | Assigned Conc. [ng/μl] | Peak Molarity [nmol/l] | % Integrated Area | Peak Comment | Observations |
|-----------|--------------------------|------------------------|------------------------|-------------------|--------------|--------------|
| 25        | 40.0                     | 40.0                   | 4710                   | -                 |              | Lower Marker |
| 1923      | 12.4                     | -                      | 19.0                   | 27.96             |              | 18S          |
| 5616      | 31.9                     | -                      | 16.7                   | 72.04             |              | 28S          |

miR-143+506

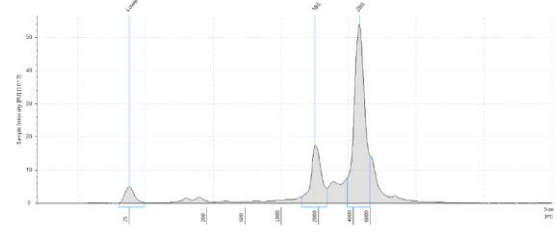

| Well | RIN <sup>®</sup> | 28S:18S (Area) | Conc. [ng/μl] | Sample Description | Alert | Observations |
|------|------------------|----------------|---------------|--------------------|-------|--------------|
| H9   | 9.6              | 3.1            | 490           |                    |       |              |

| Size [nt] | Calibrated Conc. [ng/μl] | Assigned Conc. [ng/μl] | Peak Molarity [nmol/l] | % Integrated Area | Peak Comment | Observations |
|-----------|--------------------------|------------------------|------------------------|-------------------|--------------|--------------|
| 25        | 40.0                     | 40.0                   | 4710                   | -                 |              | Lower Marker |
| 1883      | 81.2                     | -                      | 127                    | 24.11             |              | 18S          |
| 4636      | 256                      | -                      | 162                    | 75.89             |              | 28S          |

Supplementary Information Figure 5: Representative heatmaps of the pathways associated with lung cancer

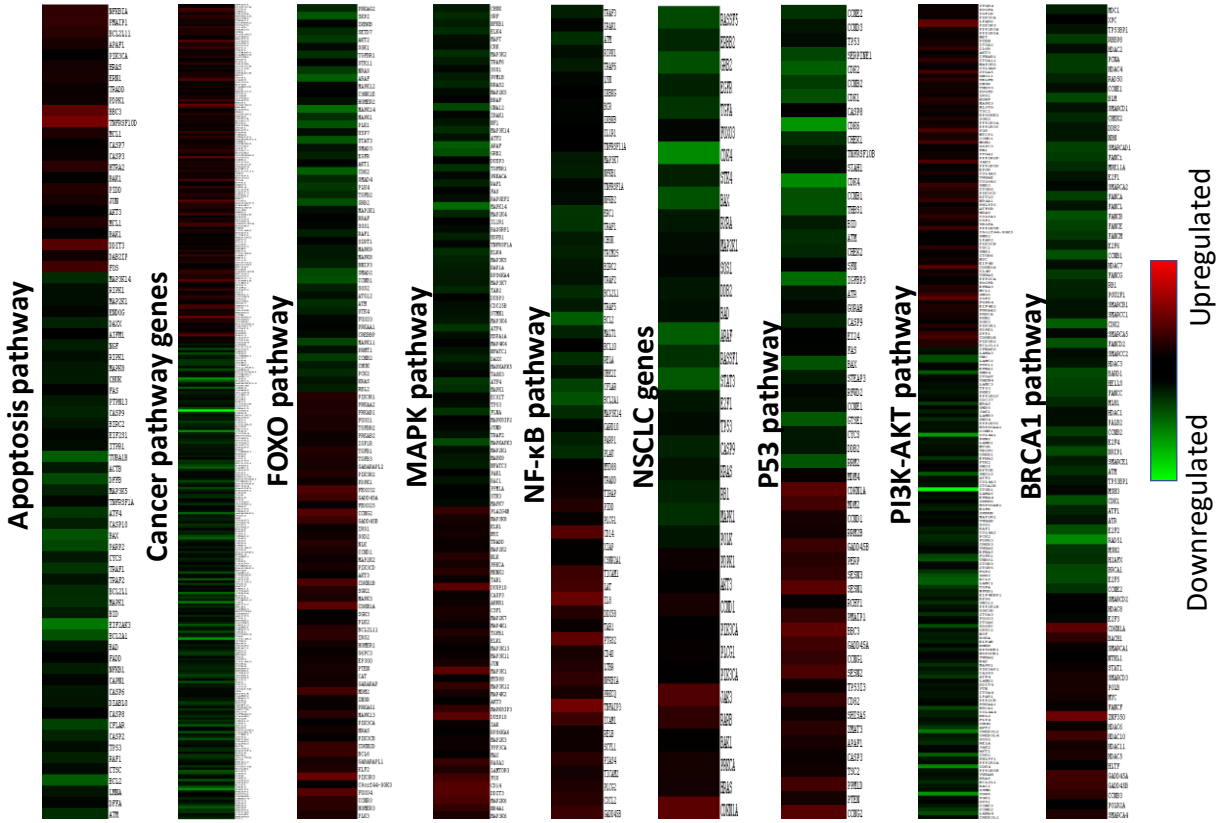



Supplementary Figure 6: Cell cycle pathway and predicted functions, as presented by IPA

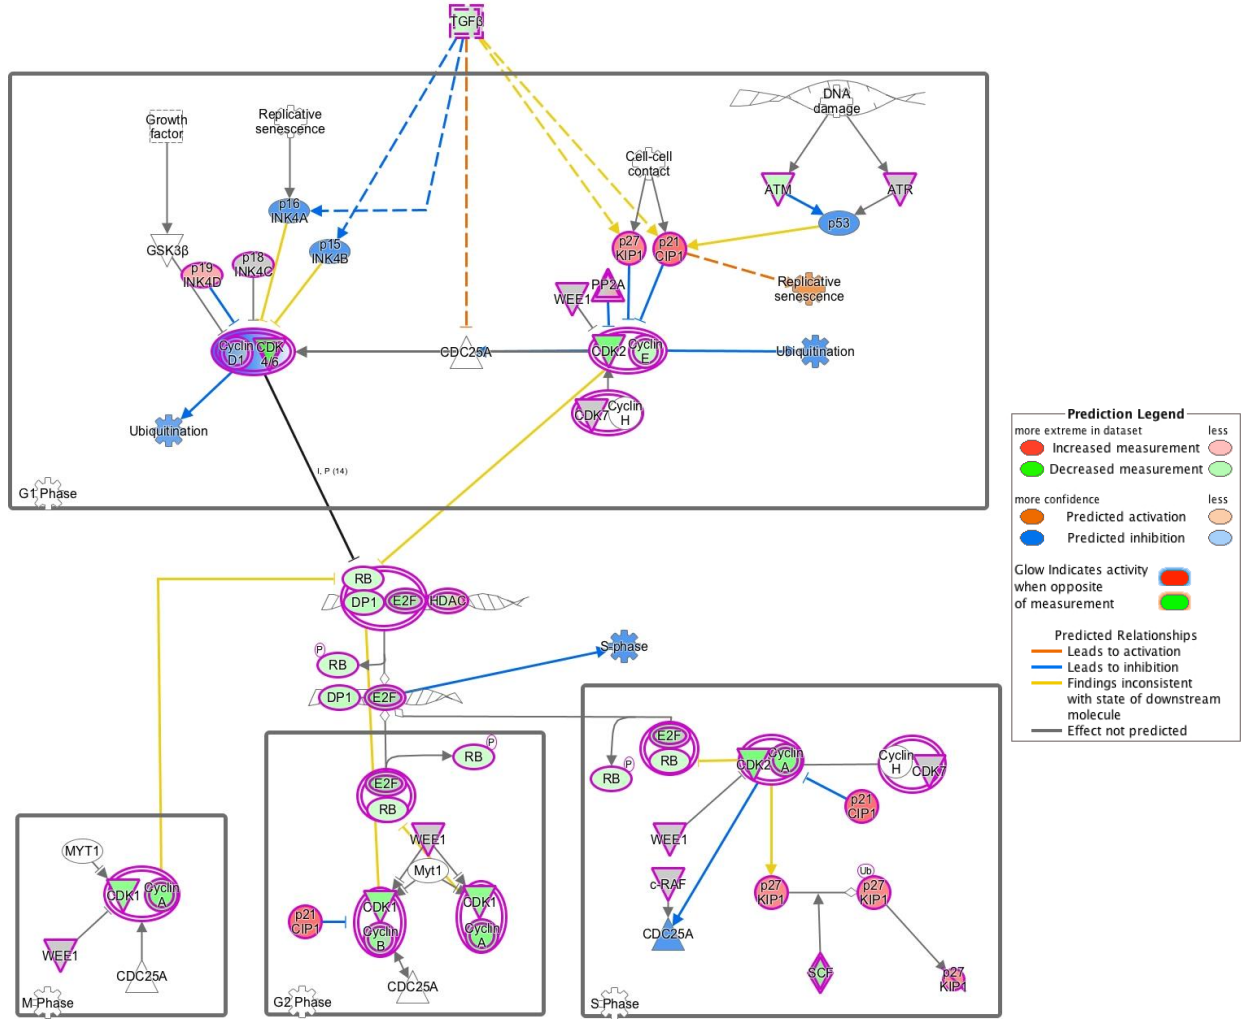

Supplementary Figure 7: Predicted functions due to miR-143 and miR-506 treatment, as predicted by IPA software

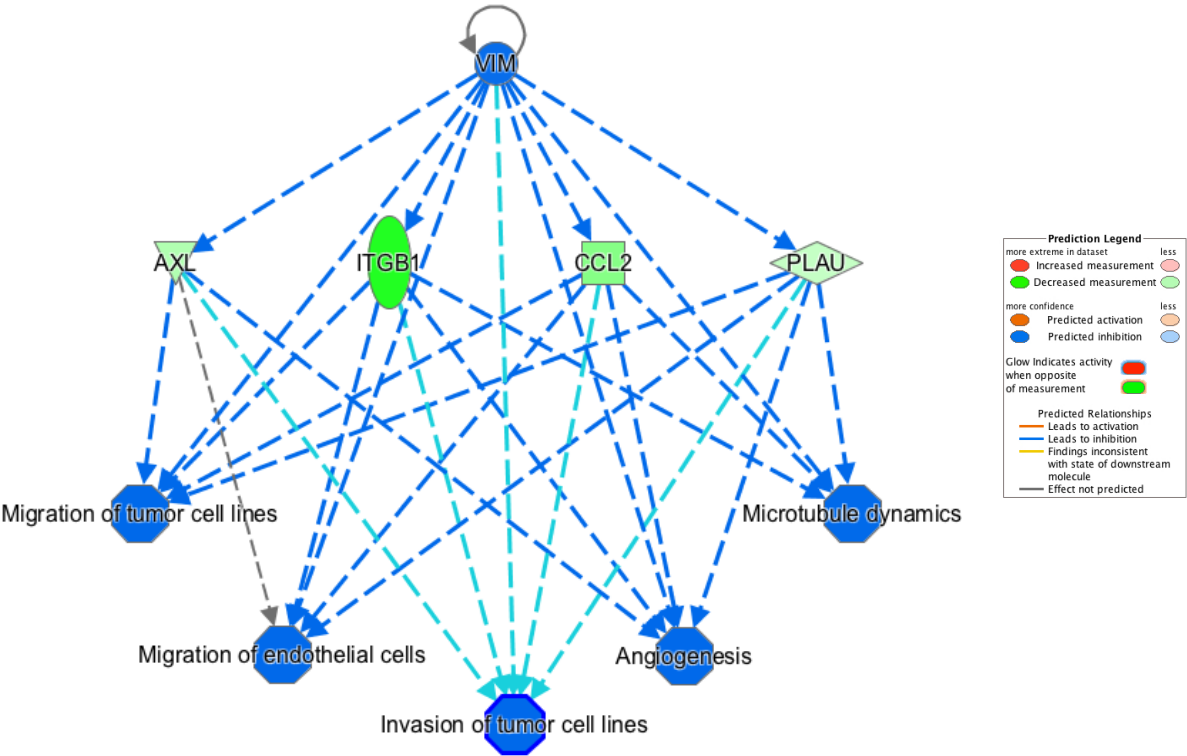

Supplementary Figure 8: BRCA1 pathway and predicted functions, as presented by IPA software, due to miR-143 and miR-506 treatment

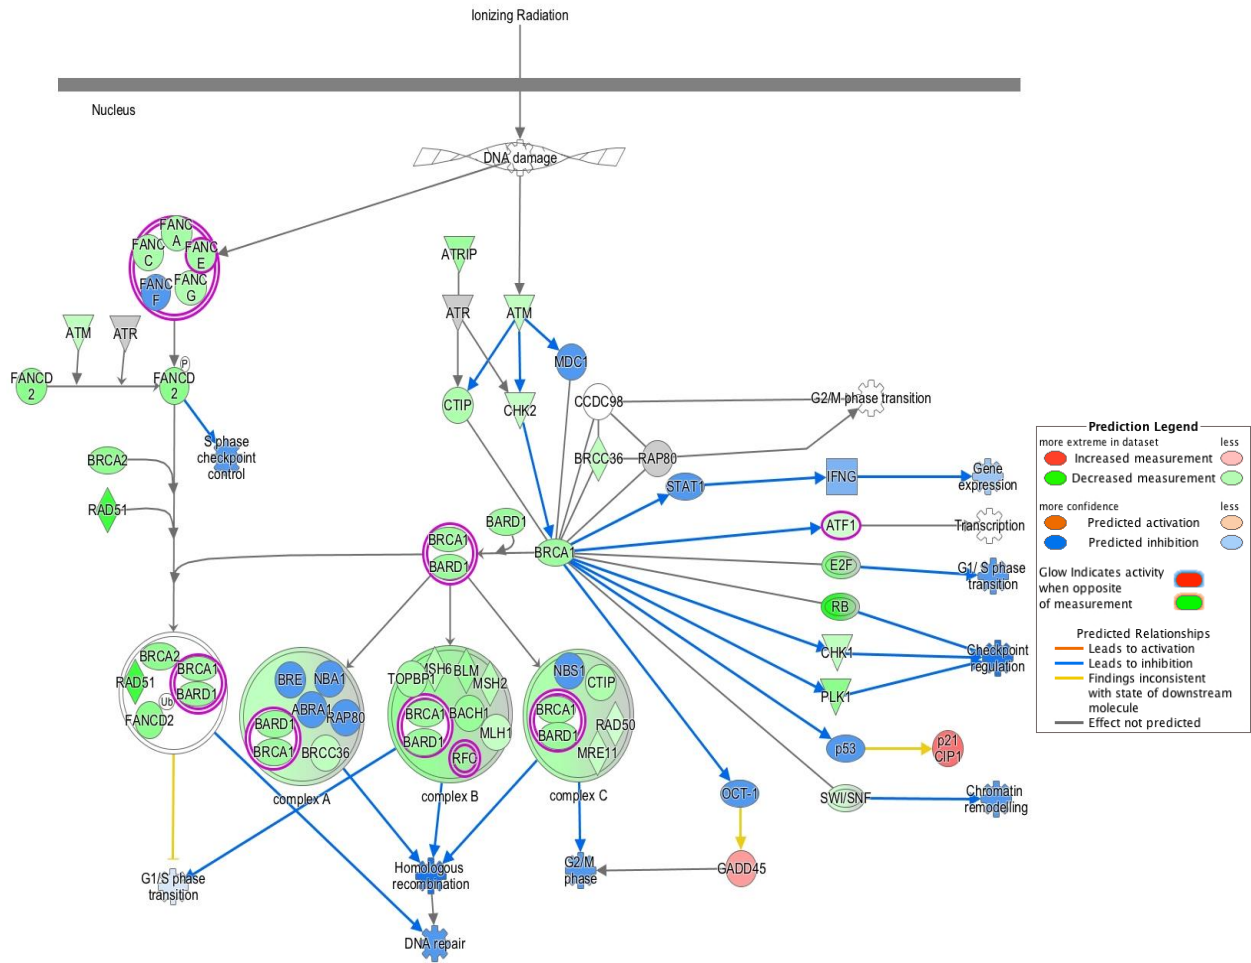

Supplementary Figure 9: Predicted apoptosis function in A549 cells due to the miR-143 and miR-506 treatment, as presented by IPA. (z-score = 3.6)

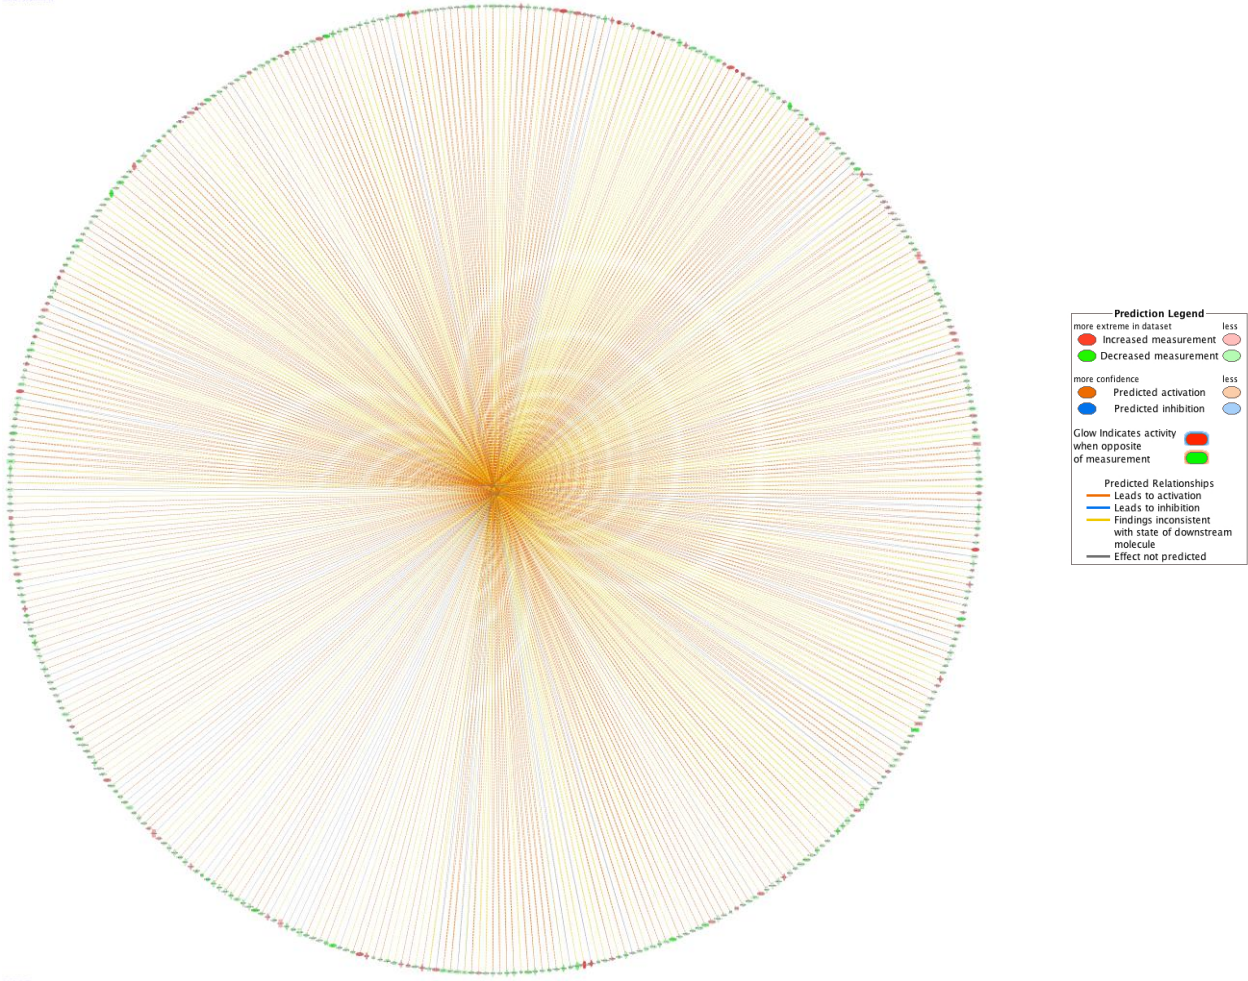

Supplementary Figure 10: (left) Predicted S phase of tumor cell lines (z-score = -3.118); (right) Predicted M phase (z-score = -2.069), as provided by IPA

S phase of tumor cell lines 25

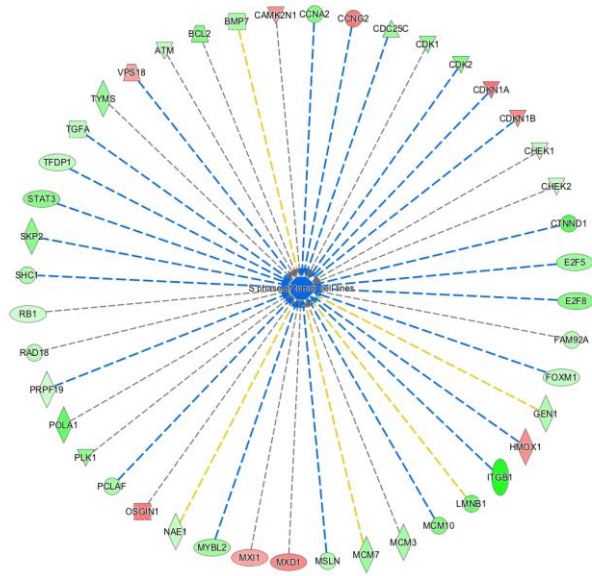

M phase 18

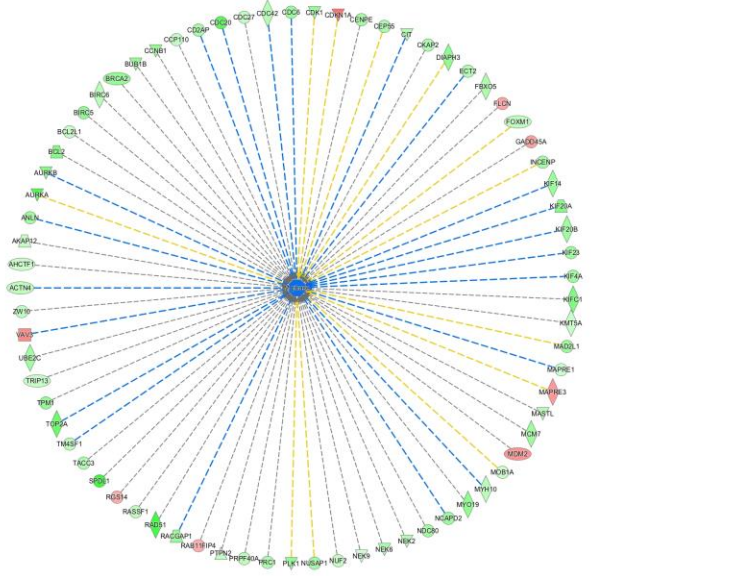

Supplementary Figure 11: Full images from Western blot analysis

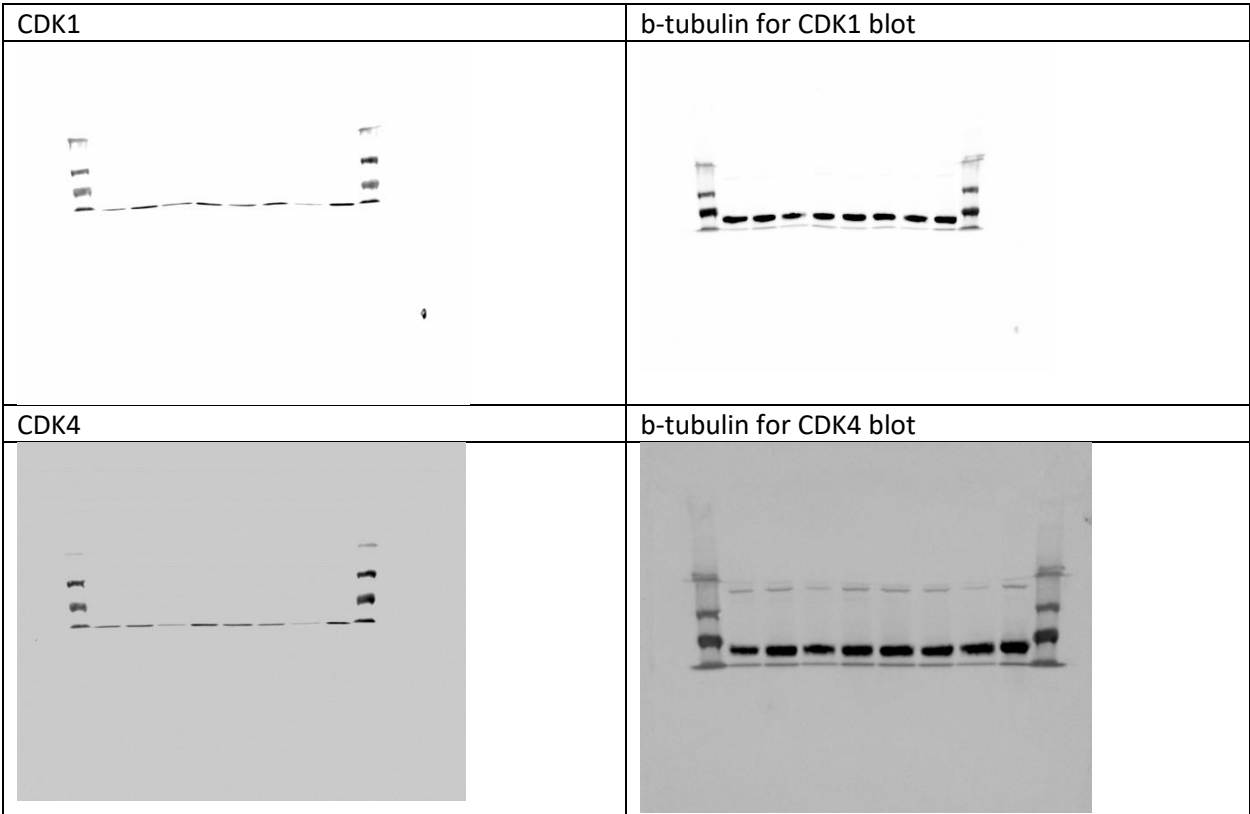

Supplement: 41598_2018_28872_MOESM1_ESM.pdf [file 41598_2018_28872_MOESM1_ESM.pdf]
